# Supplementary material for: Identification of a six microRNA signature as a novel potential prognostic biomarker in patients with head and neck squamous cell carcinoma
Source: PubMed Central journal article supplement (PMC5008307; doi:10.18632/oncotarget.7781), 2016-02-27
Supplement: oncotarget-07-21579-s001.pdf [file oncotarget-07-21579-s001.pdf]

SUPPLEMENTARY FIGURES AND TABLES

Age and Overall Survival

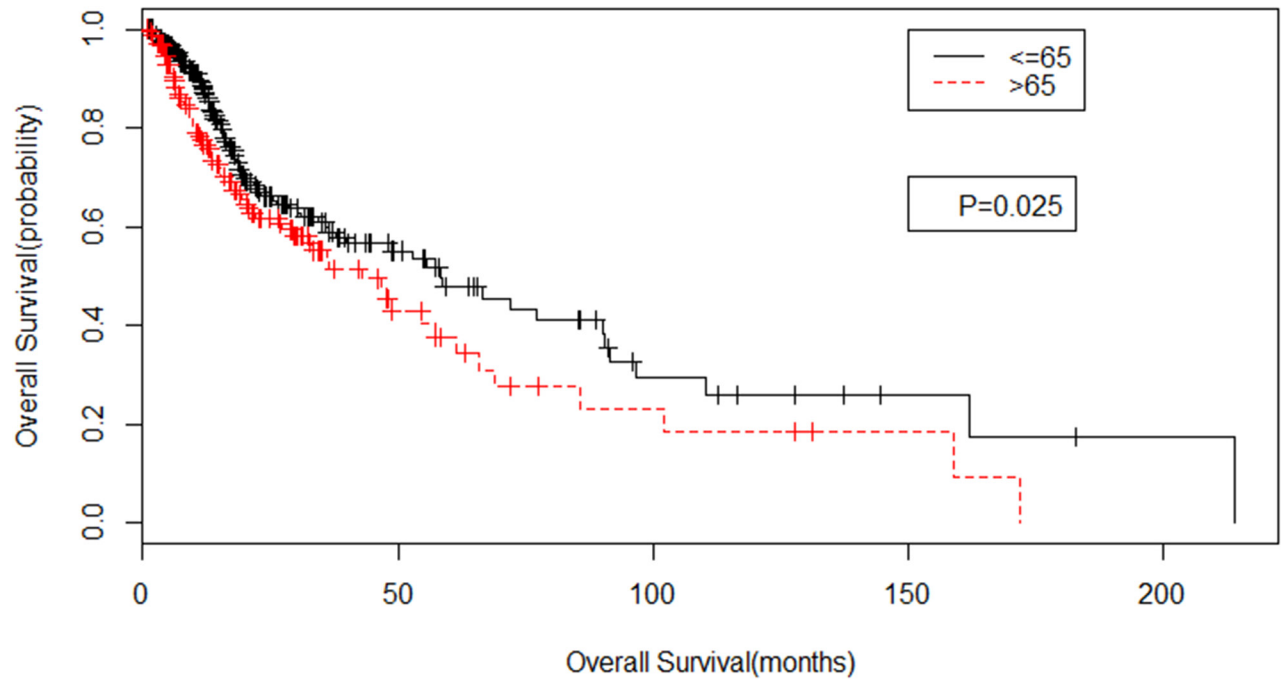

Supplementary Figure S1: Kaplan-Meier survival estimates by age in HNSCC. The P-value of overall log-rank test was 0.025.

### Gender and Overall Survival

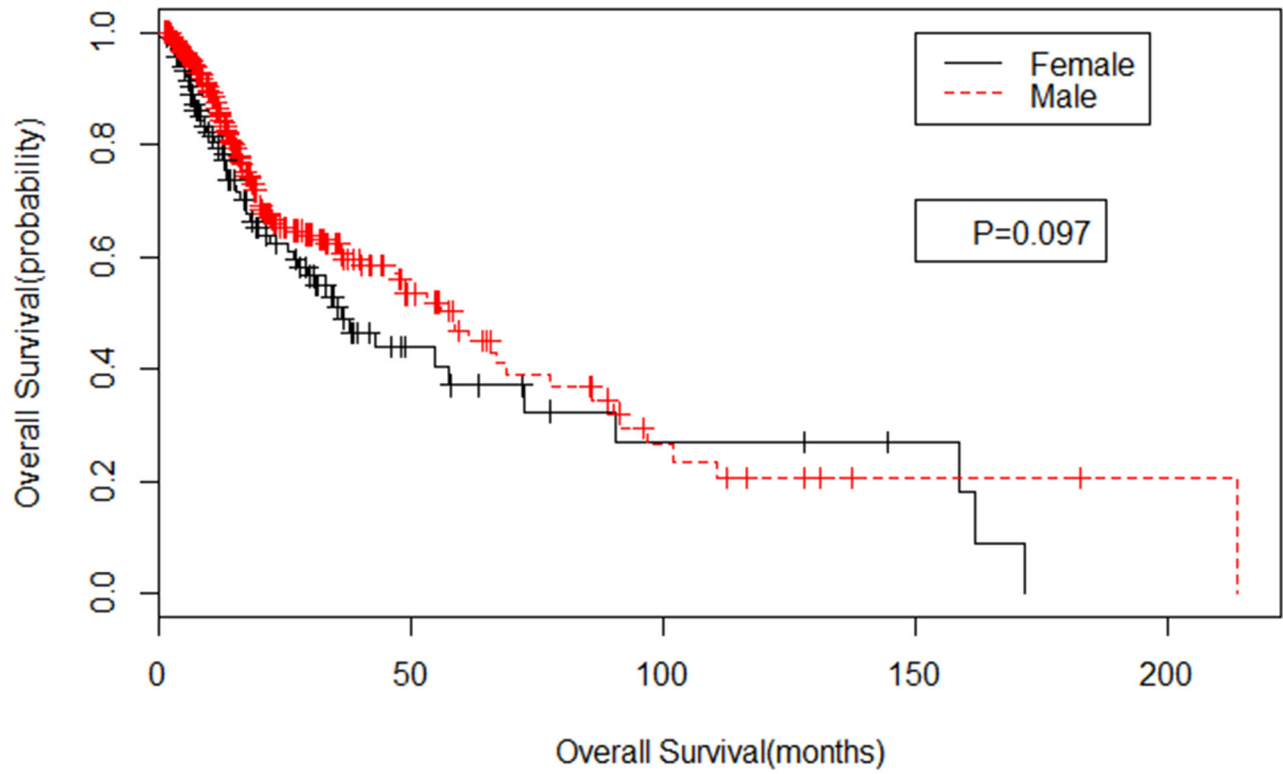

Supplementary Figure S2: Kaplan-Meier survival estimates by gender in HNSCC. The P-value of overall log-rank test was 0.10.

### Clinical\_N and Overall Survival

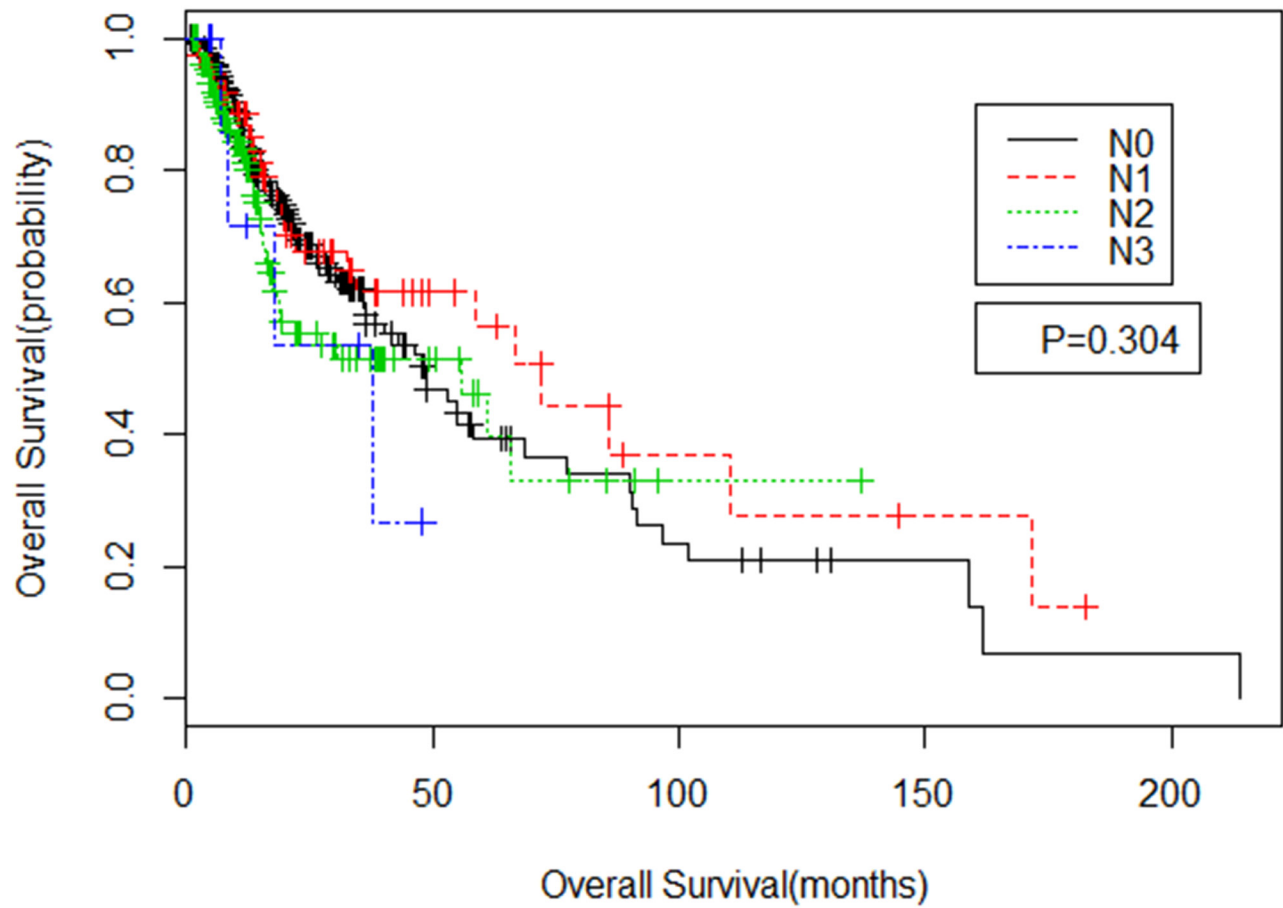

Supplementary Figure S3: Kaplan-Meier survival estimates by lymph node involvement (clinical\_N) in HNSCC. The P-value of overall log-rank test was 0.30.

### Clinicla\_M and Overall Survival

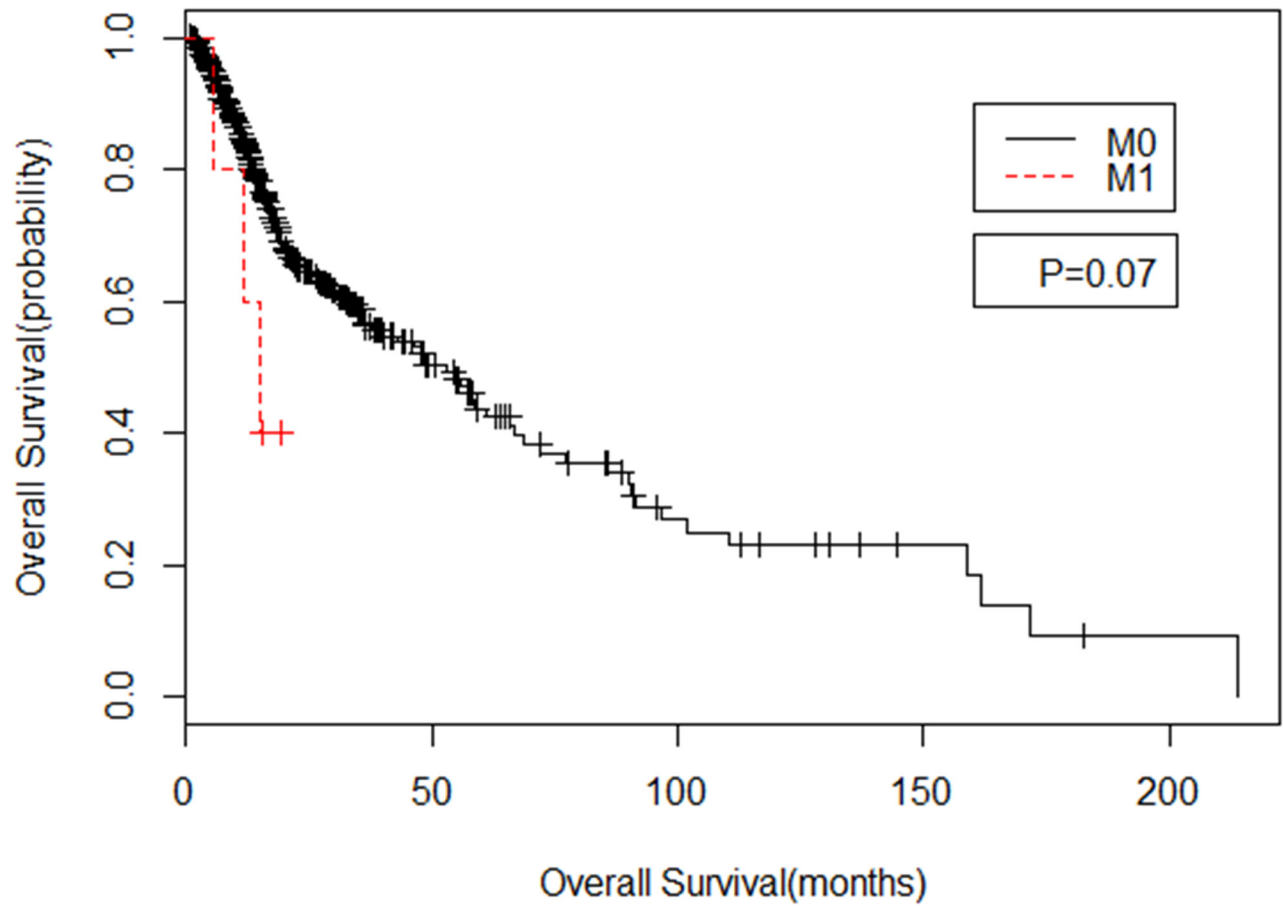

**Supplementary Figure S4: Kaplan-Meier survival estimates by distant metastases (clinical\_M) in HNSCC.** The P-value of overall log-rank test was 0.07.

### Clinical\_T and Overall Survival

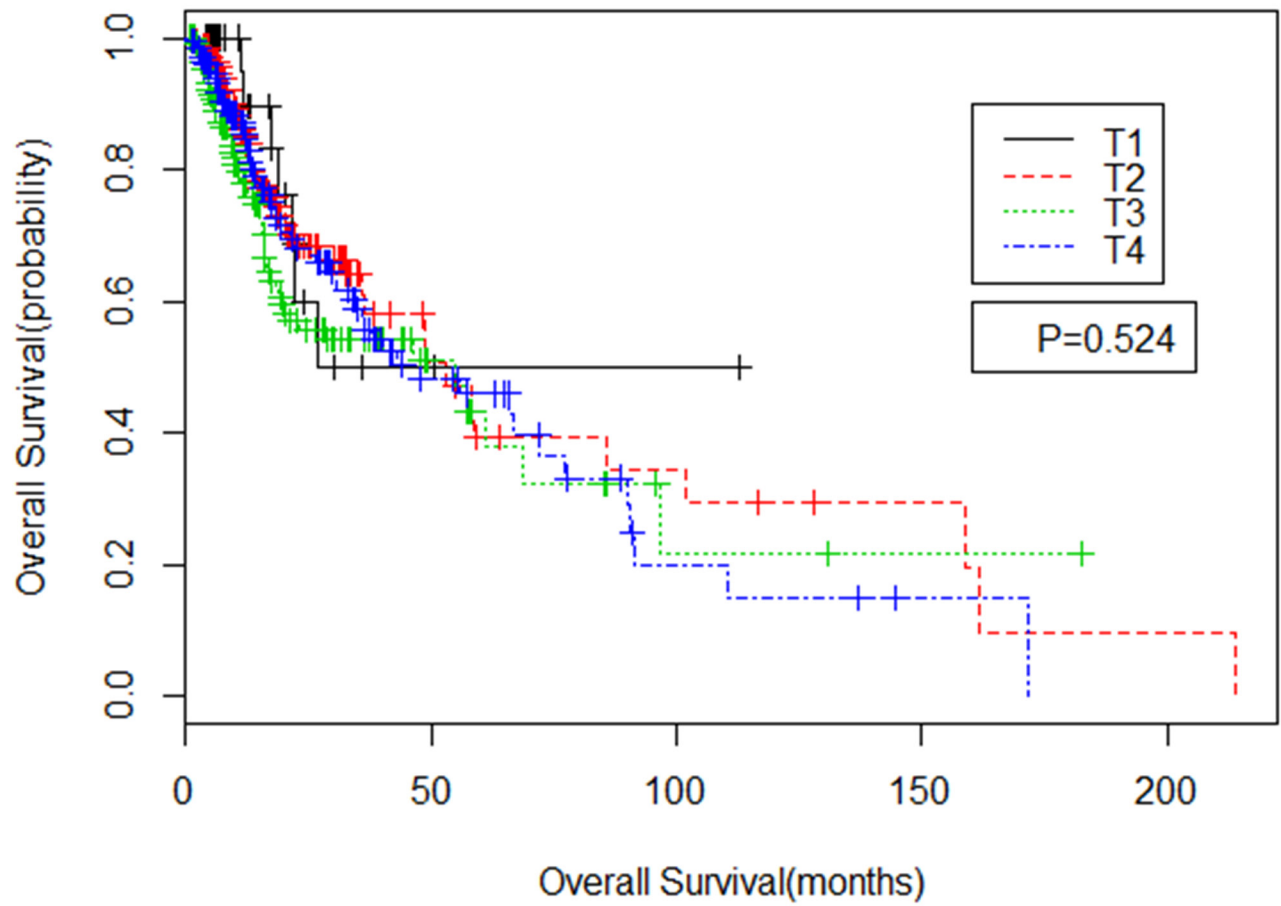

Supplementary Figure S5: Kaplan-Meier survival estimates by primary tumor (clinical\_T) in HNSCC. The P-value of overall log-rank test was 0.52.

### Clinical\_Stage and Overall Survival

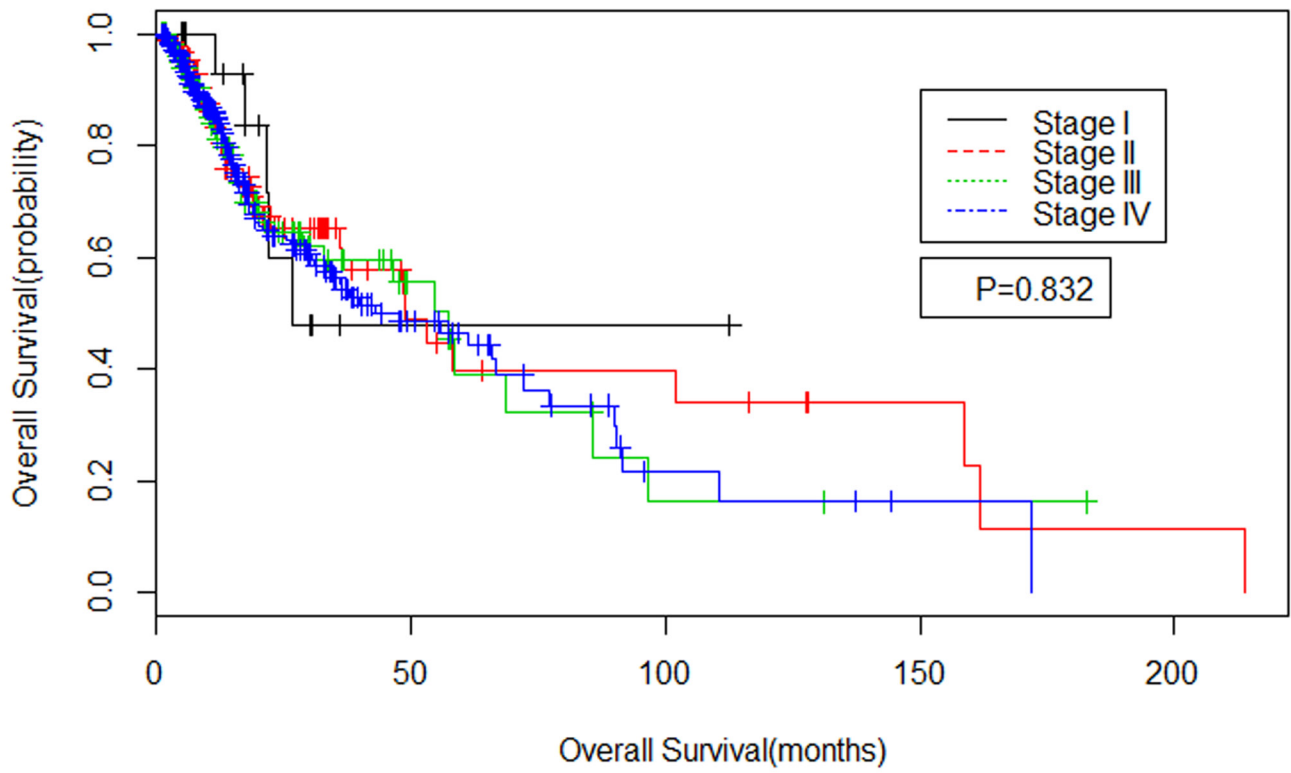

**Supplementary Figure S6: Kaplan-Meier survival estimates by disease stage (clinical\_stage) in HNSCC.** The P-value of overall log-rank test was 0.83.

### Smoking Status and Overall Survival

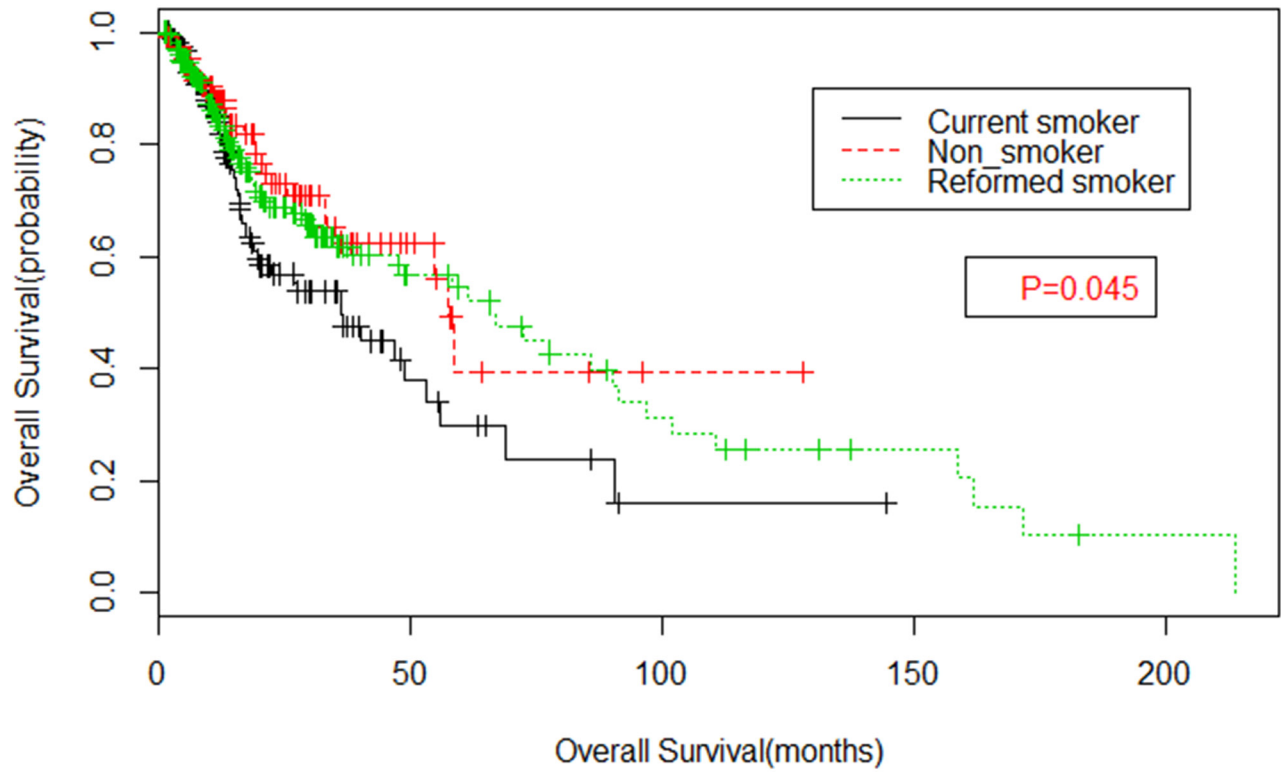

**Supplementary Figure S7: Kaplan-Meier survival estimates by smoking status in HNSCC.** The P-value of overall log-rank test was 0.045.

### Alcohol History and Overall Survival

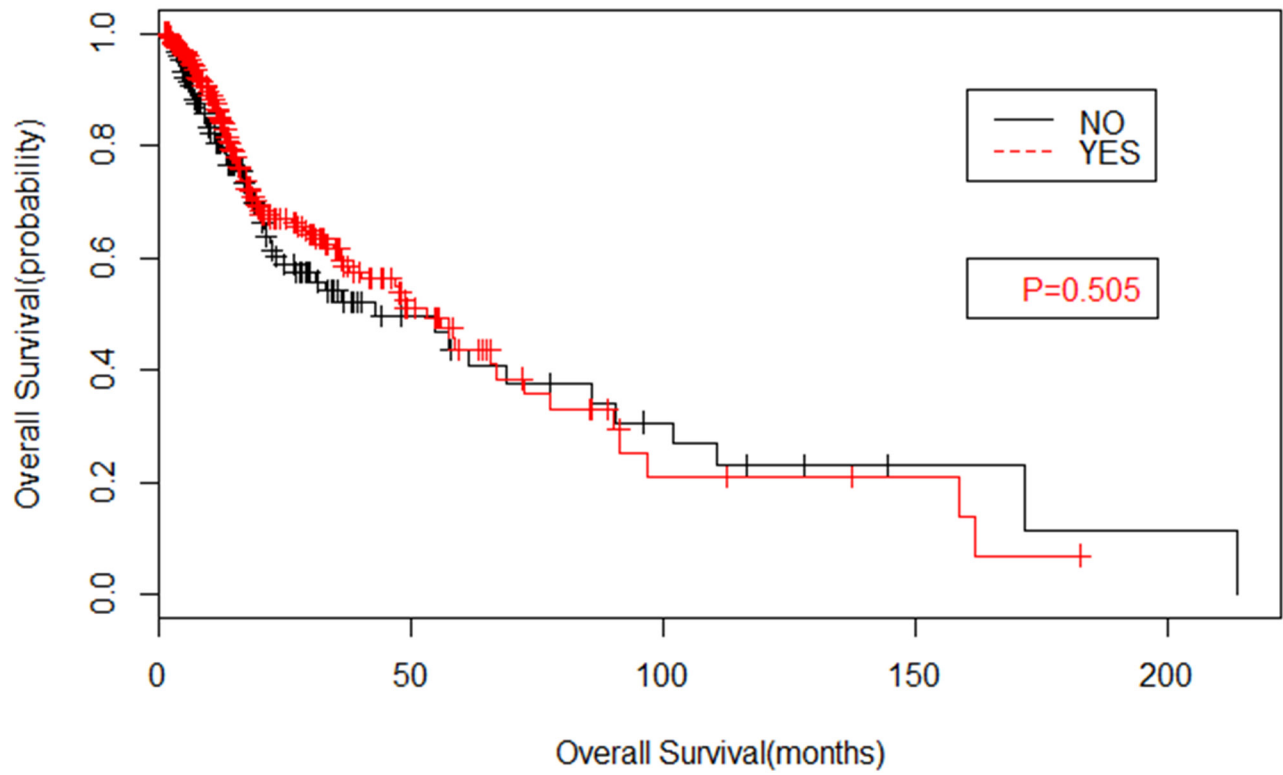

Supplementary Figure S8: Kaplan-Meier survival estimates by alcohol history in HNSCC. The P-value of overall log-rank test was 0.505.



### Perineural Invasion Present and Overall Survival

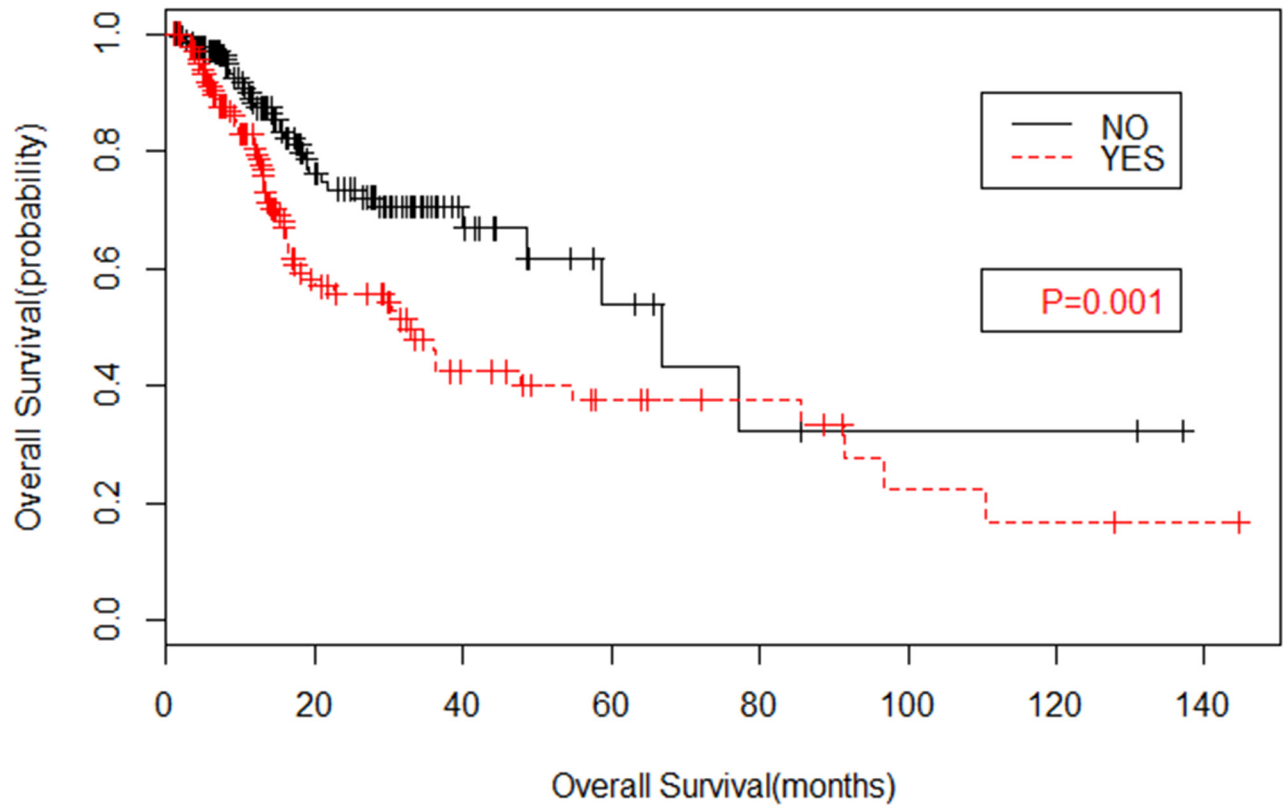

**Supplementary Figure S9: Kaplan-Meier survival estimates by perineural invasion present in HNSCC.** The P-value of overall log-rank test was 0.001.

### HPV\_p16 and Overall Survival

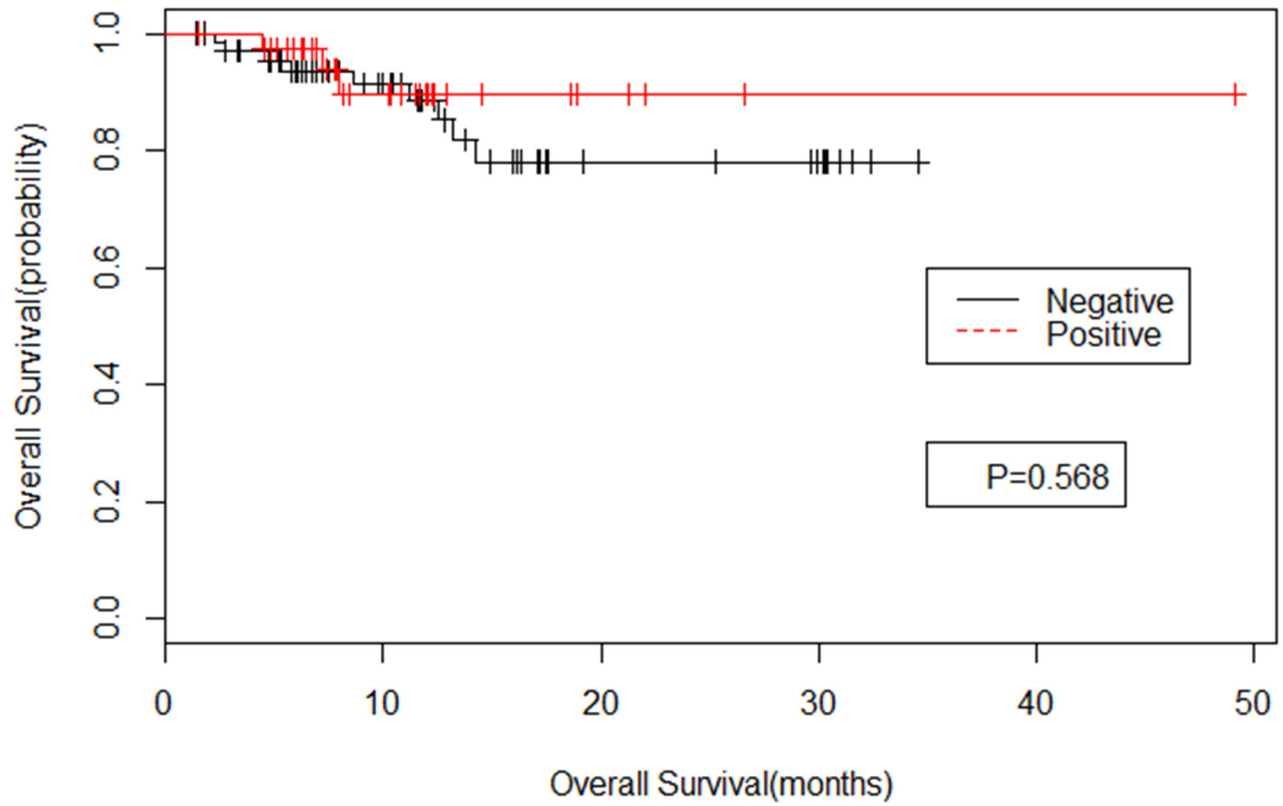

**Supplementary Figure S10: Kaplan-Meier survival estimates by HPV\_p16 status in HNSCC.** The P-value of overall log-rank test was 0.57.

### Lymphnodes positive by he and Overall Survival

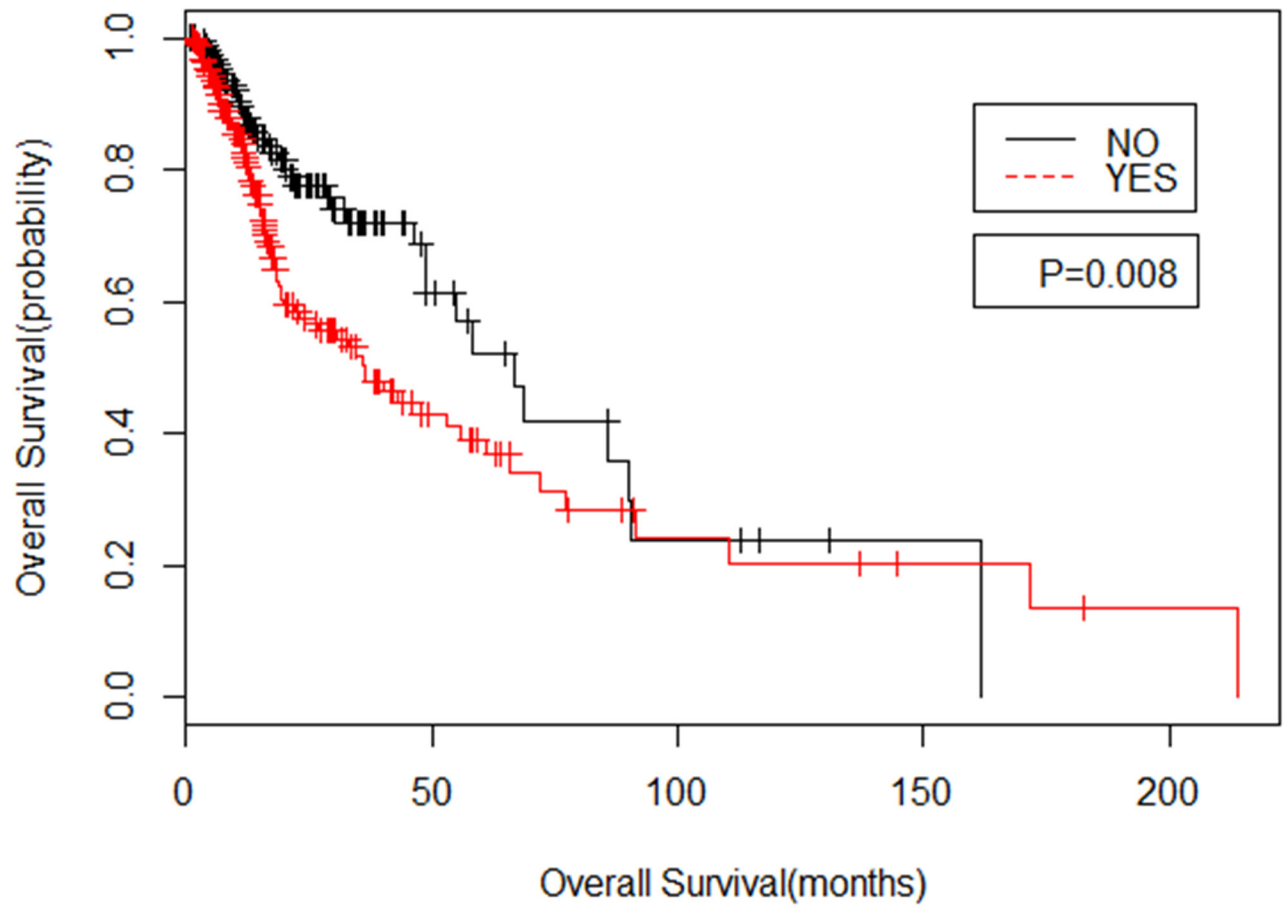

Supplementary Figure S11: Kaplan-Meier survival estimates by lymphnodes positive by he in HNSCC. The P-value of overall log-rank test was 0.008.

### Pathologic\_T and Overall Survival

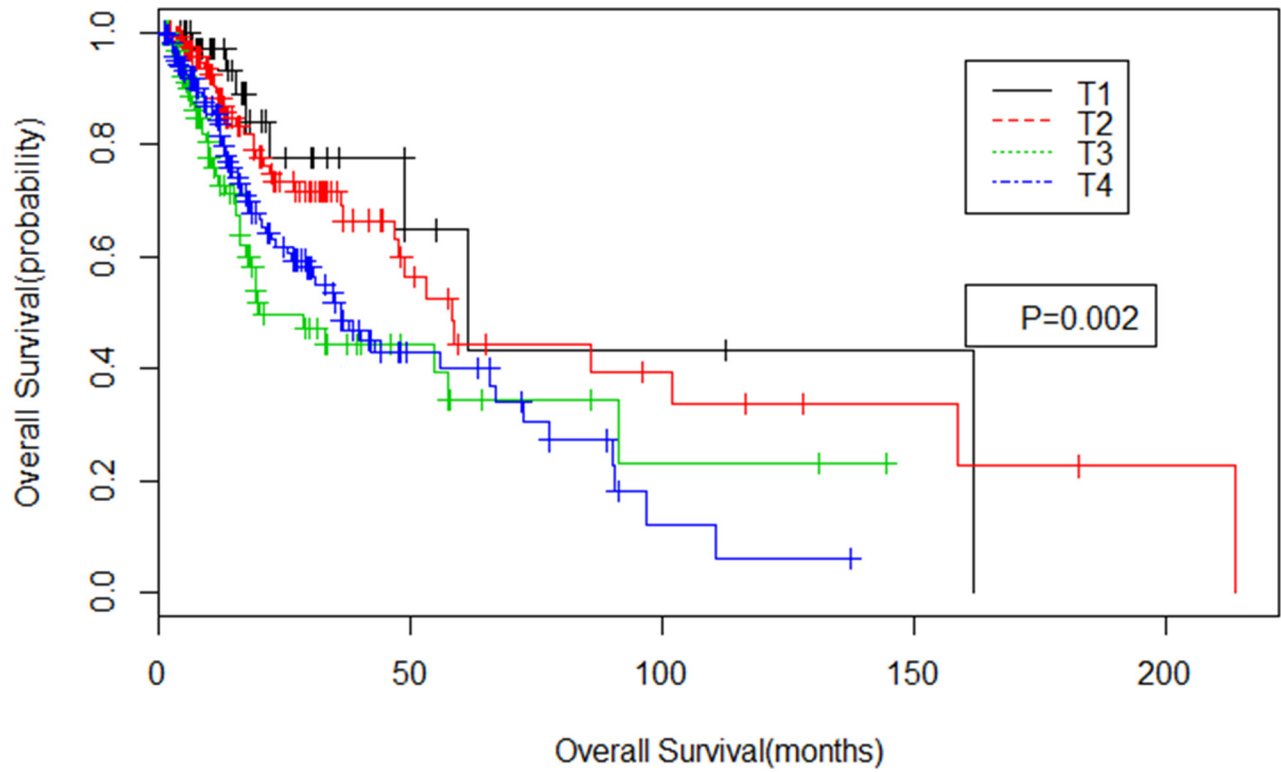

Supplementary Figure S12: Kaplan-Meier survival estimates by pathologic T in HNSCC. The P-value of overall log-rank test was 0.002.

### Pathologic\_N and Overall Survival

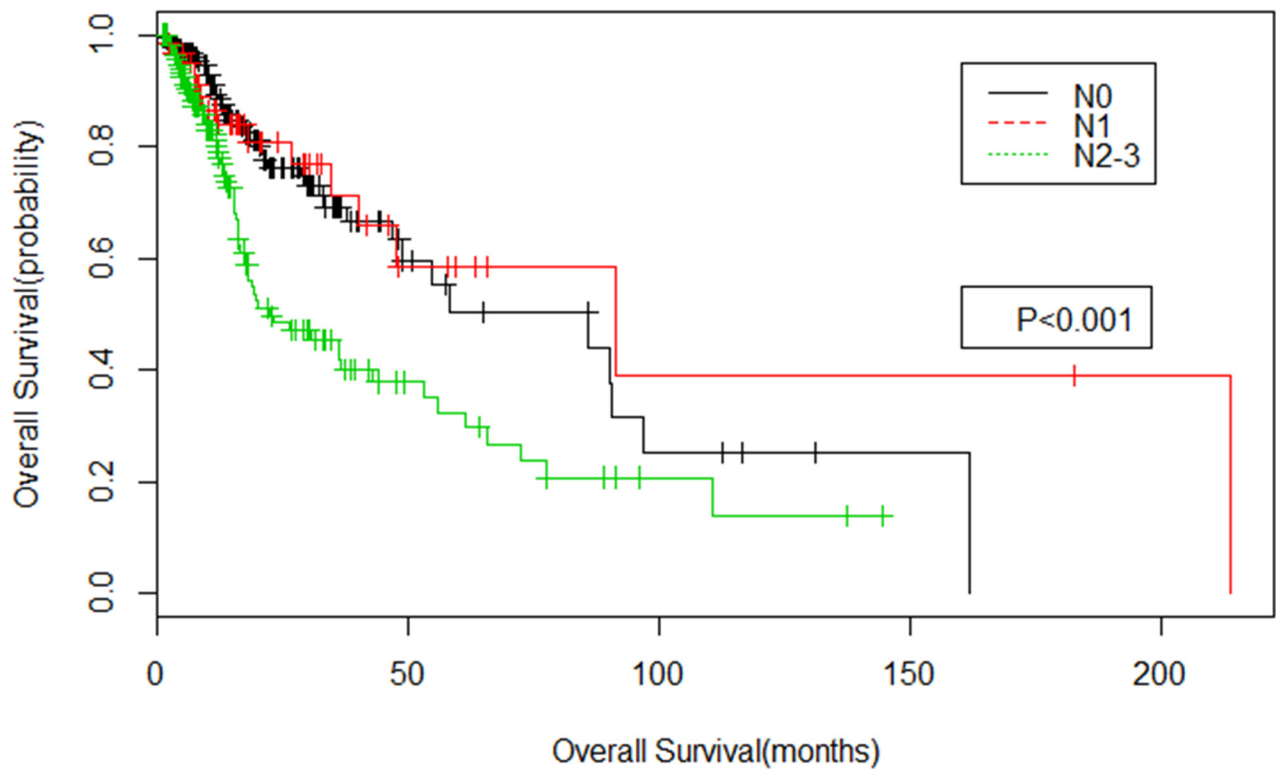

Supplementary Figure S13: Kaplan-Meier survival estimates by pathologic N in HNSCC. The P-value of overall log-rank test was <math>< 0.001</math>.

### Pathologic\_Stage and Overall Survival

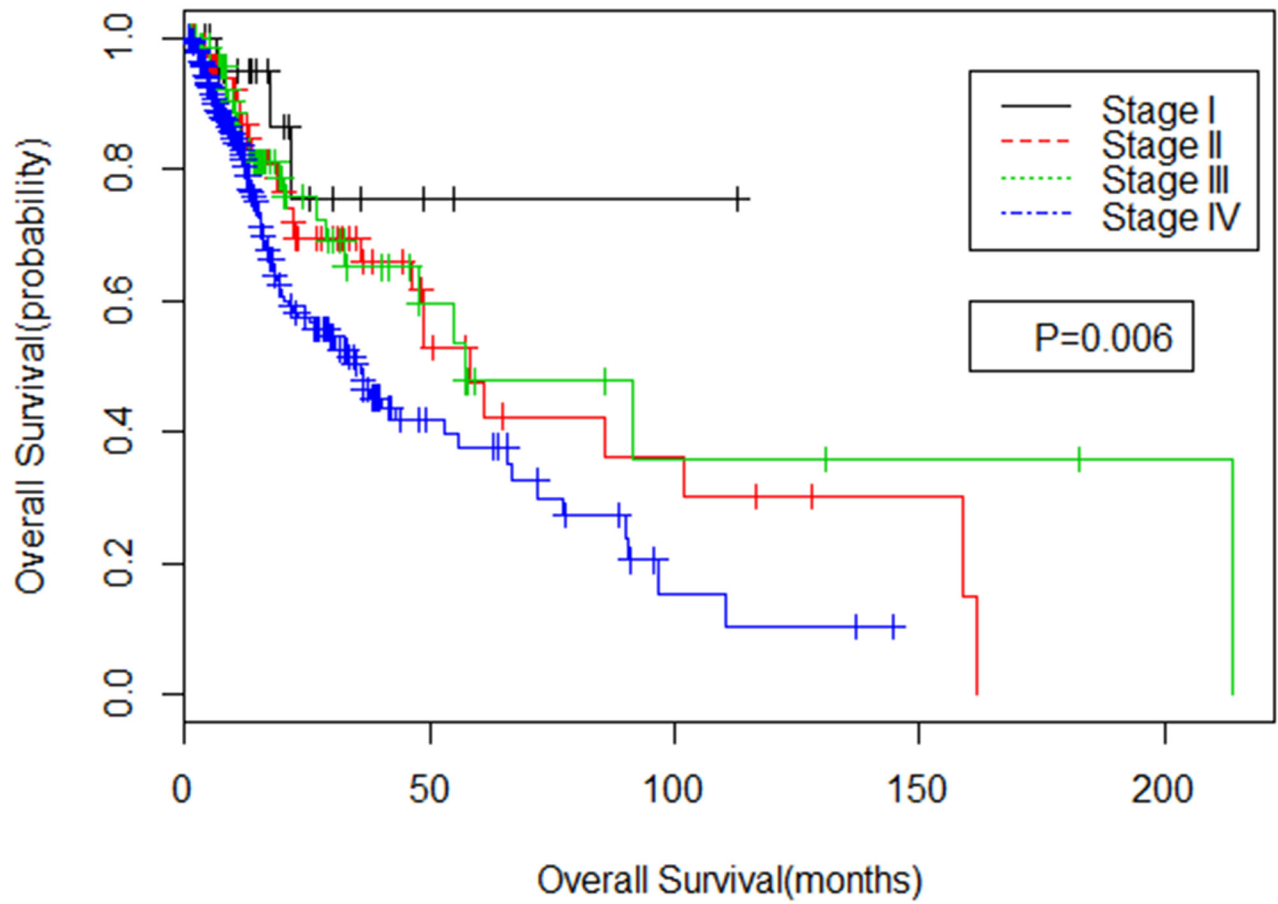

**Supplementary Figure S14: Kaplan-Meier survival estimates by pathologic stage in HNSCC.** The P-value of overall log-rank test was 0.006.

### Tumor grade and Overall Survival

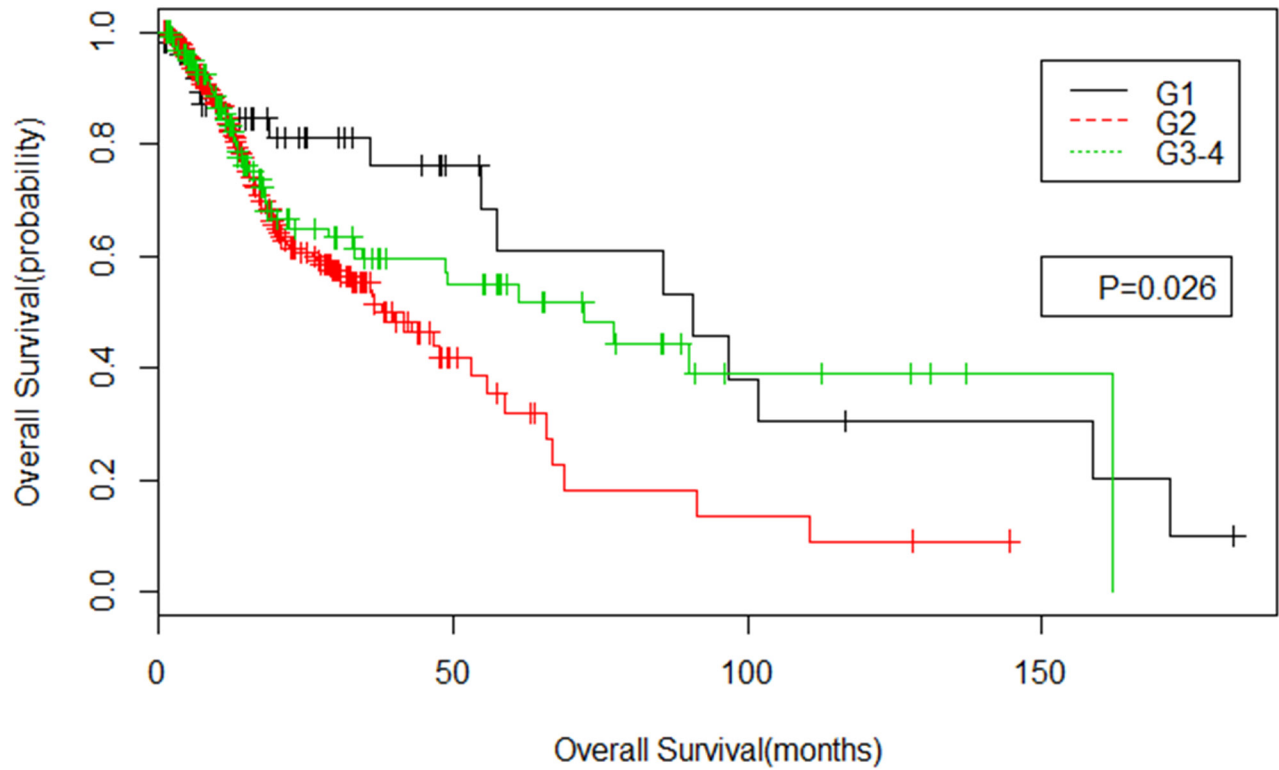

Supplementary Figure S15: Kaplan-Meier survival estimates by tumor grade in HNSCC. The P-value of overall log-rank test was 0.026.

Time = 60 months

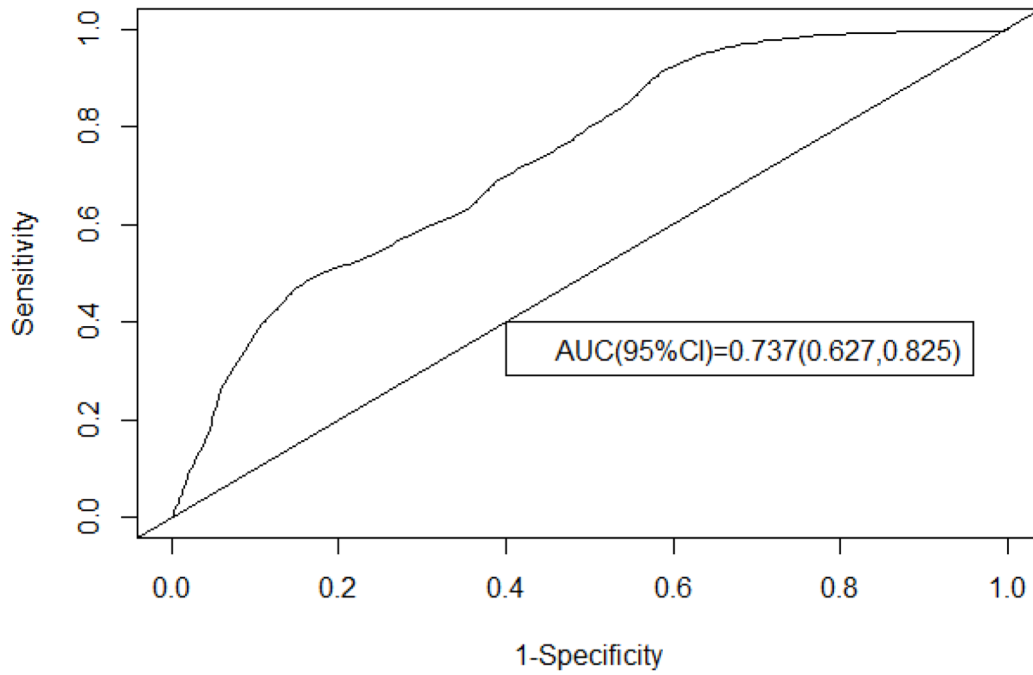

miRNA Score and Overall Survival

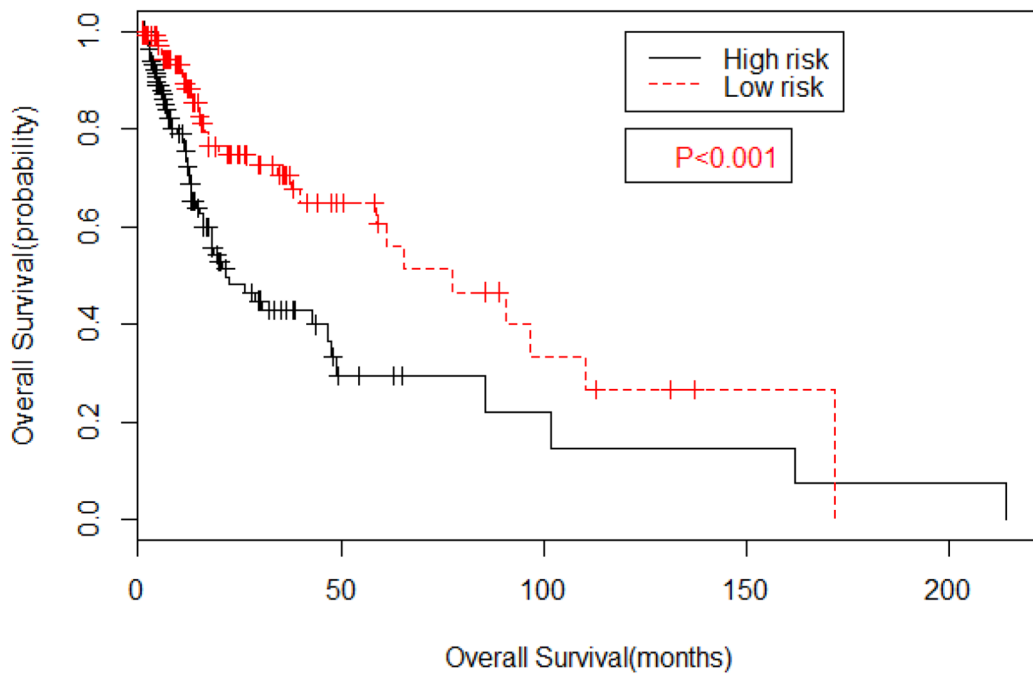

**Supplementary Figure S16: Kaplan–Meier and ROC curves for the six microRNA signature in TCGA HNSCC testing set.** A. The ROC curve for predicting 5-year survival had an AUC of 0.737 (95%CI, 0.627-0.825). B. The Kaplan–Meier curves for HNSCC risk groups obtained from the TCGA cohort testing set (n = 246) divided by the cutoff point. The P value of the log-rank test was <0.01.



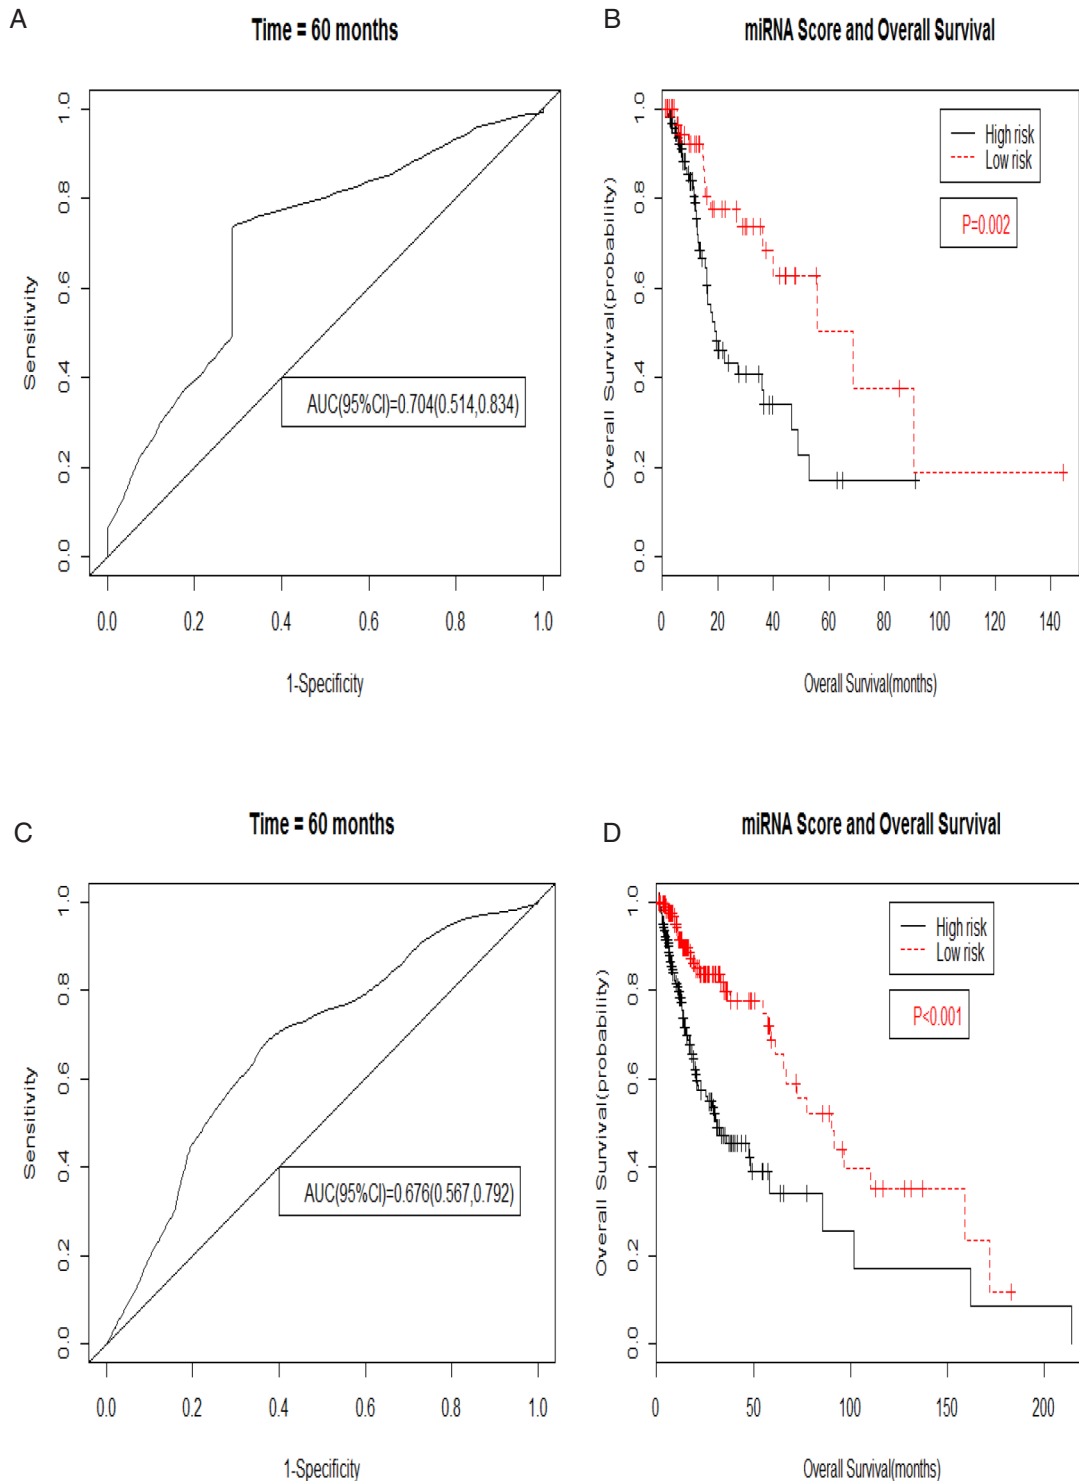

**Supplementary Figure S17: Kaplan–Meier and ROC curves for the six microRNA signature in TCGA HNSCC smoking group.** **A.** The ROC curve for predicting 5-year survival had an AUC of 0.704 (95%CI, 0.514-0.834) in the current smoking group. **B.** The Kaplan–Meier curves for HNSCC risk groups obtained from the TCGA cohort current smoking group divided by the cutoff point. The P value of the log-rank test was <0.01. **C.** The ROC curve for predicting 5-year survival had an AUC of 0.676 (95%CI, 0.567-0.792) in the current non\_smoking group. **D.** The Kaplan–Meier curves for HNSCC risk groups obtained from the TCGA cohort current non\_smoking group divided by the cutoff point. The P value of the log-rank test was <0.01.

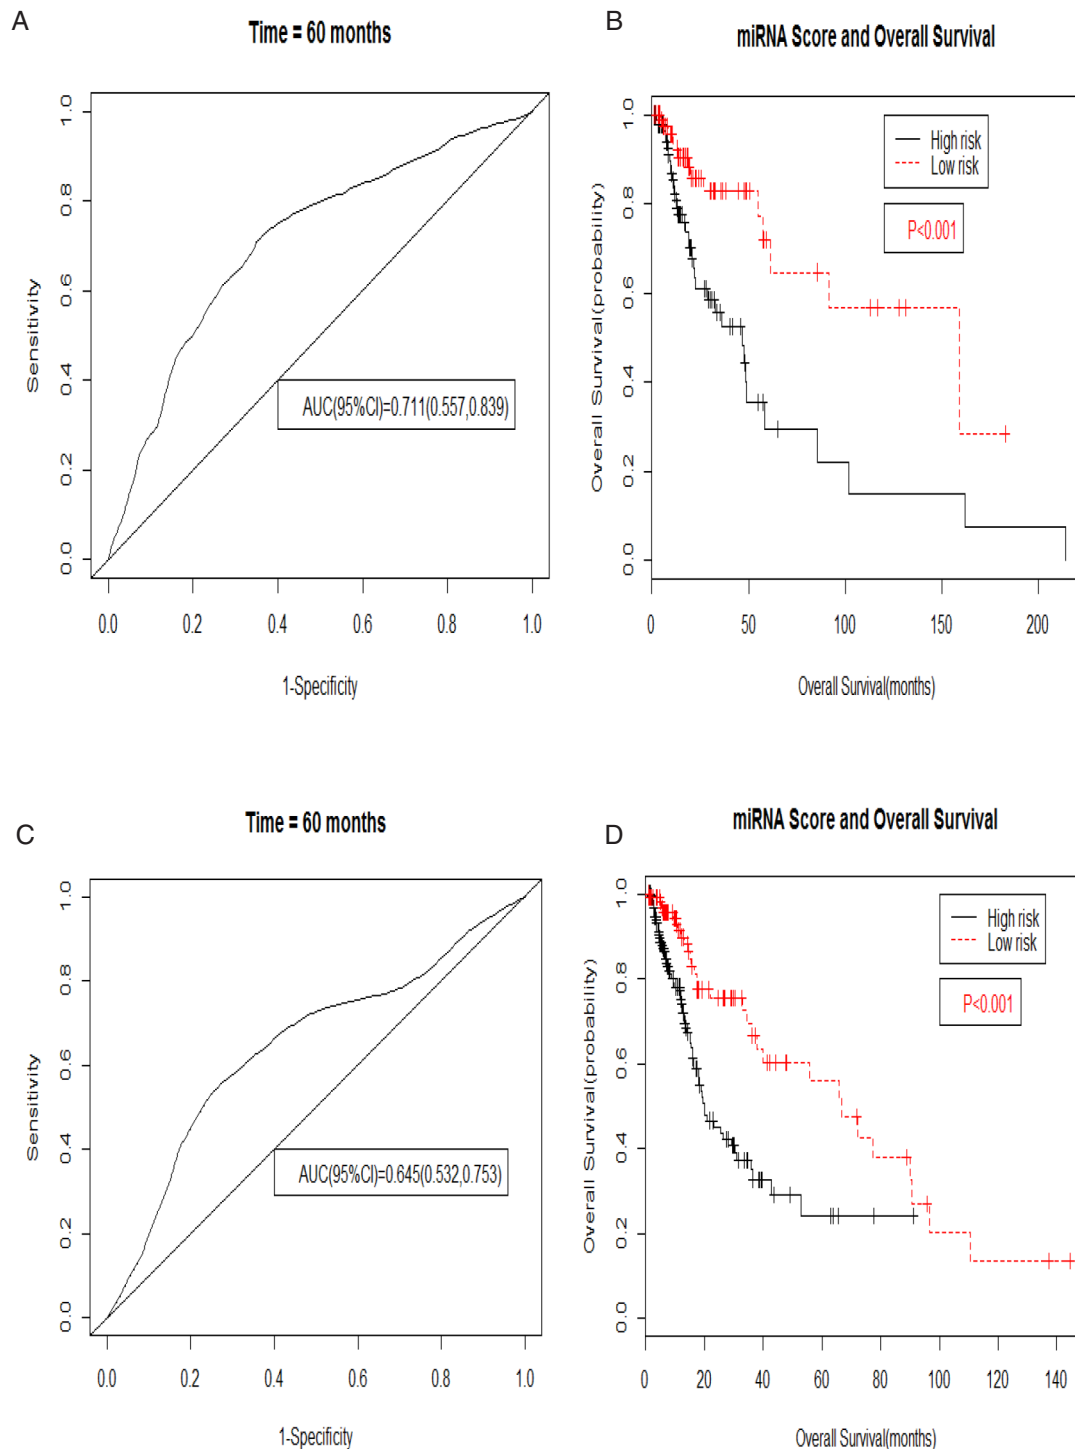

**Supplementary Figure S18: Kaplan–Meier and ROC curves for the six microRNA signature in TCGA HNSCC pathologic stage group.** **A.** The ROC curve for predicting 5-year survival had an AUC of 0.711 (95%CI, 0.557-0.839) in the pathologic stage I-III group. **B.** The Kaplan–Meier curves for HNSCC risk groups obtained from the TCGA cohort pathologic stage I-III group divided by the cutoff point. The P value of the log-rank test was <0.01. **C.** The ROC curve for predicting 5-year survival had an AUC of 0.654 (95%CI, 0.532-0.753) in the pathologic stage IV group. **D.** The Kaplan–Meier curves for HNSCC risk groups obtained from the TCGA cohort pathologic stage IV group divided by the cutoff point. The P value of the log-rank test was <0.01.

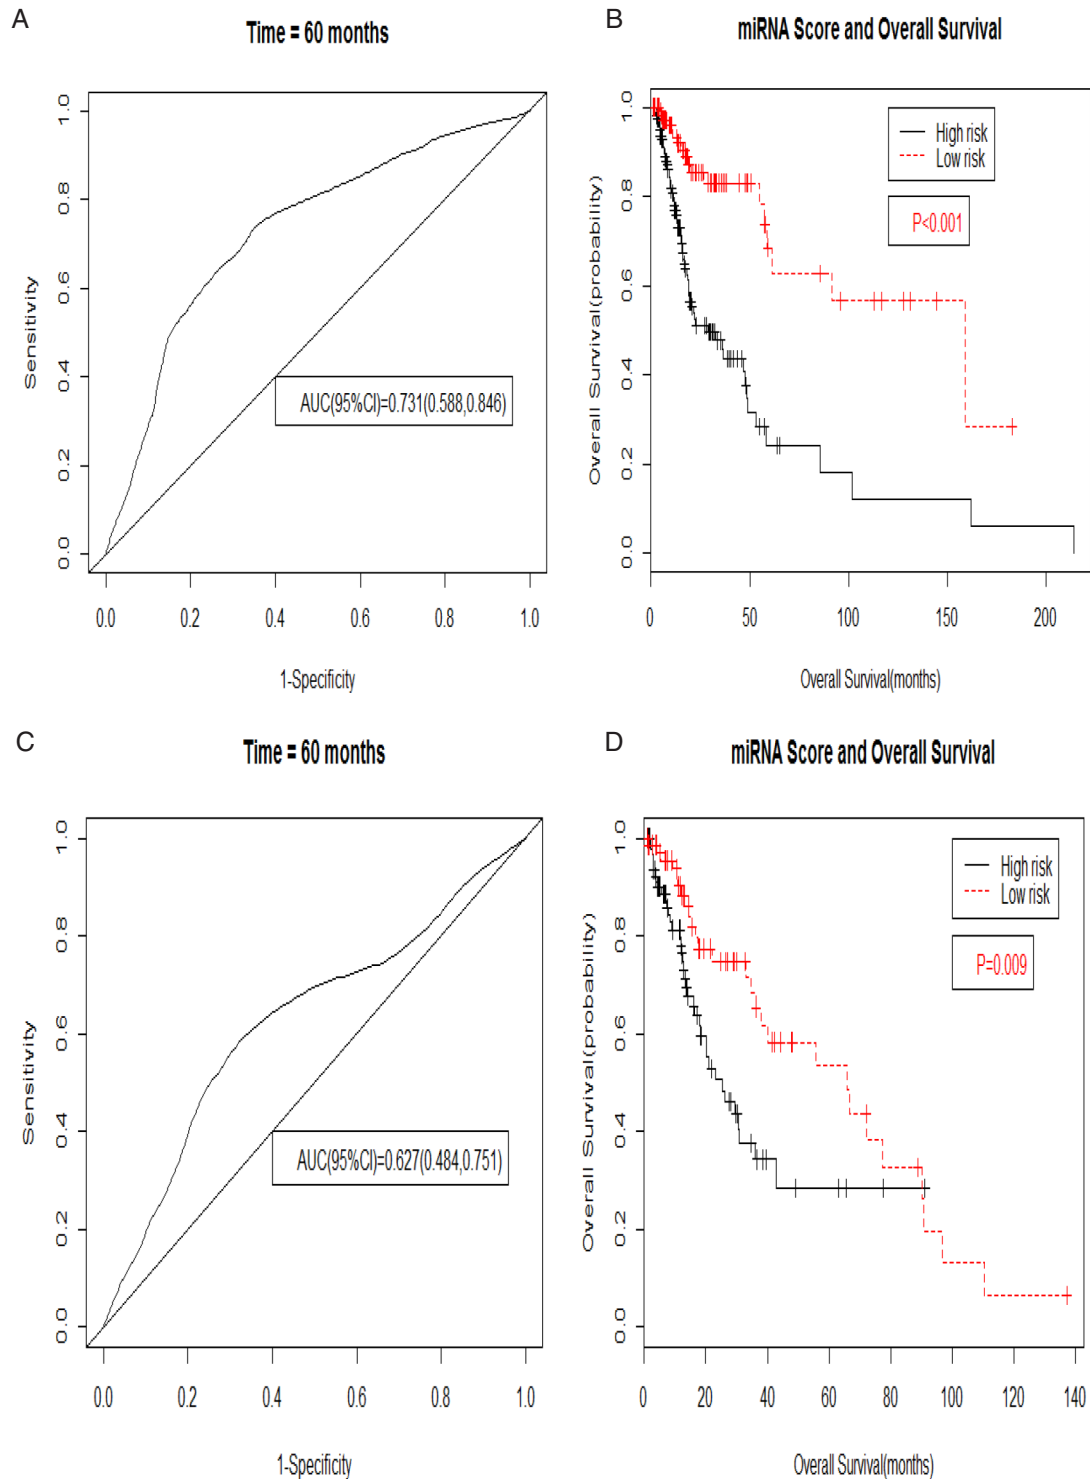

**Supplementary Figure S19: Kaplan–Meier and ROC curves for the six microRNA signature in TCGA HNSCC pathologic T group.** **A.** The ROC curve for predicting 5-year survival had an AUC of 0.731 (95%CI, 0.588-0.846) in the pathologic T1-3 group. **B.** The Kaplan–Meier curves for HNSCC risk groups obtained from the TCGA cohort pathologic T1-3 group divided by the cutoff point. The P value of the log-rank test was <0.01. **C.** The ROC curve for predicting 5-year survival had an AUC of 0.627 (95%CI, 0.484-0.751) in the pathologic T4 group. **D.** The Kaplan–Meier curves for HNSCC risk groups obtained from the TCGA cohort pathologic T4 group divided by the cutoff point. The P value of the log-rank test was <0.01.

**Targetscan**

**Miranda**

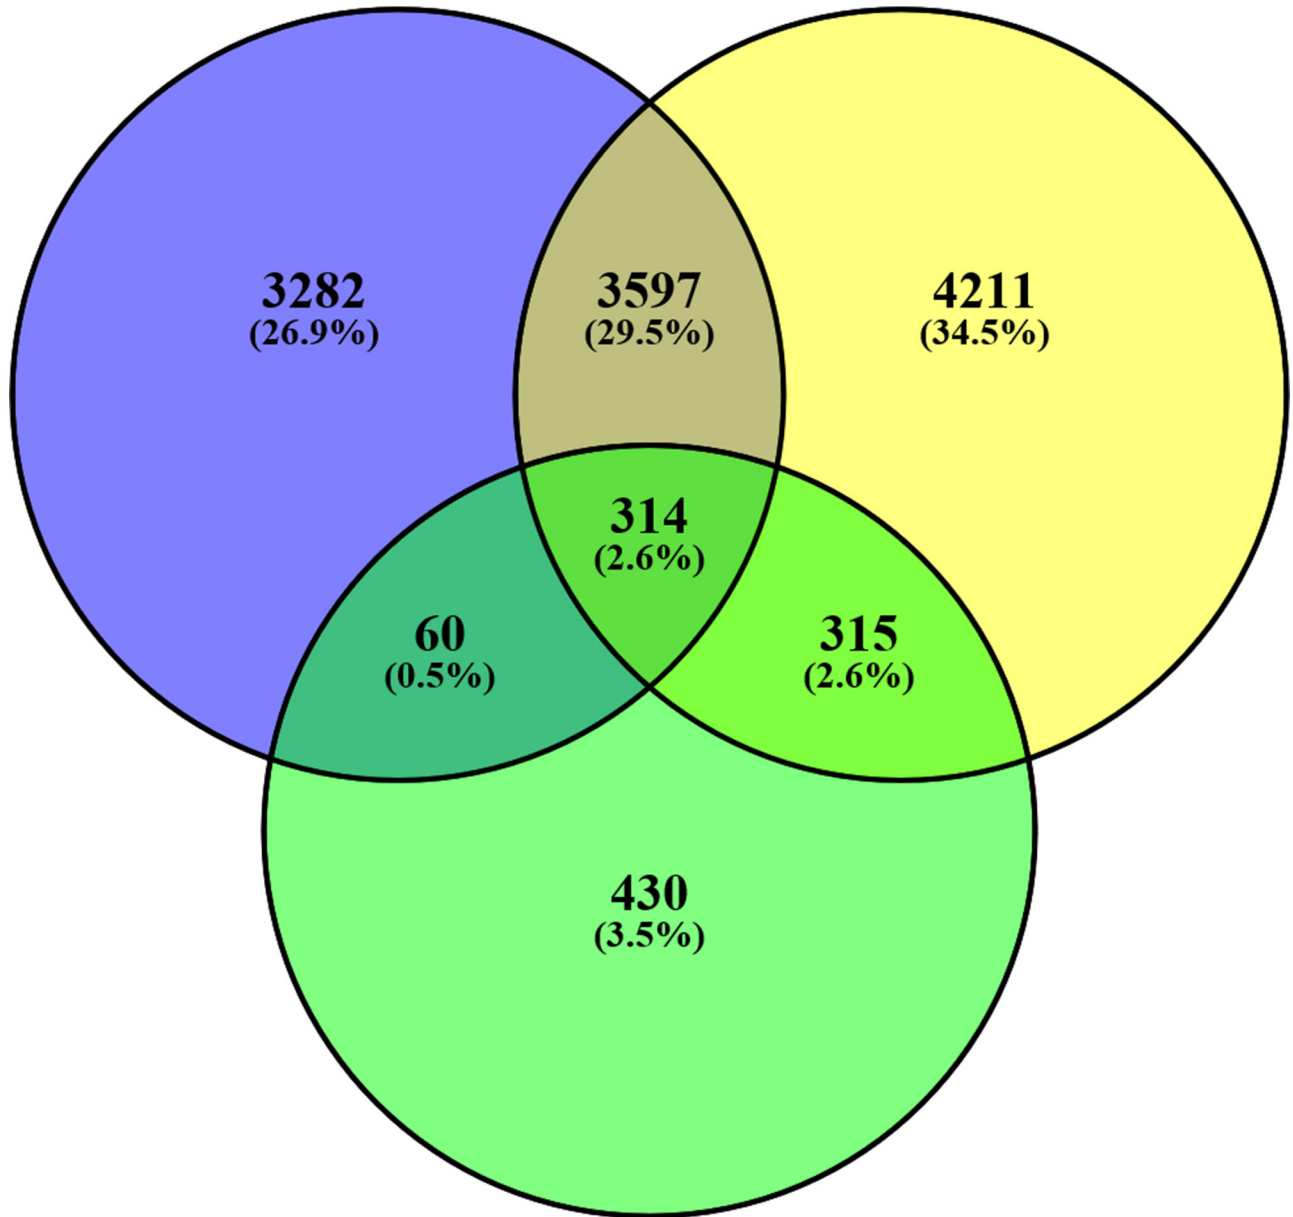

**Pictar**

Supplementary Figure S20: The Venny plot for selecting the target genes which it was in all of the three datasets.

**Supplementary Table S1: The differentially expressed miRNAs in HNSCC and normal tissue**

**See Supplementary File 1**

**Supplementary Table S2: The enrich analysis for target genes of six microRNA signature**

**See Supplementary File 2**
